# Supplementary material
Source: PubMed Central journal article supplement (PMC4948193)

Web-based Supplementary Materials for  
 “Marginal Regression Models for Clustered Count Data Based on  
 Zero-Inflated Conway-Maxwell-Poisson Distribution with Applications”

Hyoyoung Choo-Wosoba<sup>1,\*</sup>, Steven M. Levy<sup>2</sup> and Somnath Datta<sup>3</sup>

<sup>1</sup>Department of Bioinformatics and Biostatistics,  
 University of Louisville, Louisville, KY 40202, U.S.A.

<sup>2</sup>Department of Preventive & Community Dentistry  
 Department of Epidemiology,  
 University of Iowa, Iowa City, IA 52242, U.S.A.

<sup>3</sup>Department of Biostatistics  
 University of Florida, Gainesville, FL 32610, USA

\* *email:hchoo01@cardmail.louisville.edu*

**Web Appendix A.1: Estimating functions based on the MES algorithm for the zero degenerated part and the count part (CMP)**

Equation (7) is the estimating function of the zero part and below is given for the derivative term with respect to  $\gamma$ .

$$\frac{\partial p_i}{\partial \gamma} = \frac{X_{\gamma,i} e^{X_{\gamma,i} \gamma}}{(1 + e^{X_{\gamma,i} \gamma})^2},$$

and the derivative term for the count part from Equation (8) is given as

$$\frac{\partial E(\mathbf{y}_i)^T}{\partial \boldsymbol{\beta}} = \begin{pmatrix} \frac{\partial E(\mathbf{y}_i)^T}{\partial \beta_1} \\ \frac{\partial E(\mathbf{y}_i)^T}{\partial \beta_2} \\ \dots \\ \frac{\partial E(\mathbf{y}_i)^T}{\partial \beta_{p_\beta}} \end{pmatrix}_{p_\beta \times n_i} \quad \text{and each component is calculated as}$$

$$\frac{\partial E(\mathbf{y}_{ij})}{\partial \beta_k} = x_{\beta,ijk} \left( \sum_{s=0}^{\infty} \frac{s^2 \lambda_{ij}^s}{(s!)^v} / Z(\lambda_{ij}, v) - \left[ \sum_{s=0}^{\infty} \frac{s \lambda_{ij}^s}{(s!)^v} / Z(\lambda_{ij}, v) \right]^2 \right)$$

$$Var(y_{ij}) = \sum_{s=0}^{\infty} \frac{s^2 \lambda_{ij}^s}{(s!)^v} / Z(\lambda_{ij}, v) - \left[ \sum_{s=0}^{\infty} \frac{s \lambda_{ij}^s}{(s!)^v} / Z(\lambda_{ij}, v) \right]^2.$$

Here,  $x_{\beta,ijk}$  is the  $k^{th}$  covariate corresponding to the count part in the  $j^{th}$  element within the  $i^{th}$  subject and  $Var(y_{ij})$  is the  $j^{th}$  diagonal element of  $D_i$ .

## Web Appendix A.2: Estimating a dispersion parameter, $v$ , based on the MPL method for a CMP distribution of $\mathbf{y}$

We estimating the dispersion parameter,  $v$ , from Equation (6) where

$$\frac{\partial \ell_{ij}^c}{\partial v} = \left( -\log(y_{ij}!) + \sum_{s=0}^{\infty} \frac{\lambda_{ij}^s \log(s!)}{(s!)^v} / Z(\lambda_{ij}, v) \right) (1 - u_{ij}),$$

$$\frac{\partial \ell_{ij}^c}{\partial v^2} = \left( -\sum_{s=0}^{\infty} \frac{\lambda_{ij}^s (\log(s!))^2}{(s!)^v} / Z(\lambda_{ij}, v) + \left[ \sum_{s=0}^{\infty} \frac{\lambda_{ij}^s \log(s!)}{(s!)^v} / Z(\lambda_{ij}, v) \right]^2 \right) (1 - u_{ij}).$$

**Web Appendix B.1: Estimating a correlation coefficient,  $\delta$ , based on the MES algorithm for zero-degenerated distribution of  $u$**

Estimation of the common off-diagonal correlation coefficient  $\delta$  is carried out from Equation (9) leading to

$$\hat{\delta} = \frac{\frac{1}{N^*} \sum_{i=1}^N \sum_{s < t} \frac{(u_{is} - p_{is})(u_{it} - p_{it})}{\sqrt{p_{is}(1-p_{is})p_{it}(1-p_{it})}}}{\frac{1}{N_{total}} \sum_{i=1}^N \sum_{j=1}^{n_i} \frac{(u_{ij} - p_{ij})^2}{p_{ij}(1-p_{ij})}},$$

where  $N^* = \sum_{i=1}^N n_i(n_i - 1)/2$  and  $N_{total} = \sum_{i=1}^N n_i$ . See, e.g., Kong *et al.* (2014).

**Web Appendix B.2: Estimating a correlation coefficient,  $\rho$  based on the MES algorithm for a CMP distribution of  $y$**

Estimation of the common off-diagonal correlation coefficient  $\rho$  is carried out from Equation (10) leading to

$$\hat{\rho} = \frac{\frac{1}{N^*} \sum_{i=1}^N \sum_{s < t} \frac{(1-u_{is})(1-u_{it})(y_{is} - E(y_{is}))(y_{it} - E(y_{it}))}{\sqrt{Var(y_{is})Var(y_{it})}}}{\frac{1}{N_{total}} \sum_{i=1}^N \sum_{j=1}^{n_i} \frac{(1-u_{ij})^2 (y_{ij} - E(y_{ij}))^2}{Var(y_{ij})}},$$

where  $N^* = \sum_{i=1}^N \sum_{s < t} (1 - u_{is})(1 - u_{it})$  and  $N_{total} = \sum_{i=1}^N \sum_{j=1}^{n_i} (1 - u_{ij})^2$ . See, e.g., Kong *et al.* (2014).

**Web Appendix C.1: (a modified/adjusted) Sandwich covariance matrix of  $\widehat{\beta}$ ,  $\widehat{\gamma}$  and  $\widehat{v}$**

**based on the MPL method**

The partial derivatives of  $\ell$  with respect to  $\beta$ ,  $\gamma$  and  $v$  from Equations (12) and (13) are given follows:

- For  $\beta$ ,

$$\frac{\partial \ell}{\partial \beta_k} = \sum_{i=1}^N \sum_{j=1}^{n_i} I(y_{ij} = 0) x_{\beta,ijk} \frac{- (1 - p_{ij}) / Z(\lambda_{ij}, v)^2 \sum_{s=0}^{\infty} \frac{s \lambda_{ij}^s}{(s!)^v}}{p_{ij} + (1 - p_{ij}) / Z(\lambda_{ij}, v)} +$$

$$\sum_{i=1}^N \sum_{j=1}^{n_i} I(y_{ij} \geq 1) x_{\beta,ijk} (y_{ij} - \sum_{s=0}^{\infty} \frac{s \lambda_{ij}^s}{(s!)^v} / Z(\lambda_{ij}, v)).$$

$$\frac{\partial^2 \ell}{\partial \beta \partial \beta^T} = X_{\beta}^T \text{diag} \left[ I(y_{ij} = 0) \times \right.$$

$$\left. \frac{\left[ \left( 2 / Z(\lambda_{ij}, v) \sum_{s=0}^{\infty} \frac{s \lambda_{ij}^s}{(s!)^v} - (1 - p_{ij}) / Z(\lambda_{ij}, v)^2 \sum_{s=0}^{\infty} \frac{s^2 \lambda_{ij}^s}{(s!)^v} \right) \left\{ p_{ij} + (1 - p_{ij}) / Z(\lambda_{ij}, v) \right\} - \left\{ \frac{(1 - p_{ij})}{Z(\lambda_{ij}, v)^2} \sum_{s=0}^{\infty} \frac{s \lambda_{ij}^s}{(s!)^v} \right\}^2 \right]}{\left\{ p_{ij} + (1 - p_{ij}) / Z(\lambda_{ij}, v) \right\}^2} \right] X_{\beta} -$$

$$X_{\beta}^T \text{diag} \left[ I(y_{ij} \geq 1) \left[ \sum_{s=0}^{\infty} \frac{s^2 \lambda_{ij}^s}{(s!)^v} / Z(\lambda_{ij}, v) - \left( \sum_{s=0}^{\infty} \frac{s \lambda_{ij}^s}{(s!)^v} / Z(\lambda_{ij}, v) \right)^2 \right] \right] X_{\beta}$$

where  $X_{\beta}$  is a  $\left( \sum_{i=1}^N n_i \times p_{\beta} \right)$  matrix.

• For  $\gamma$ ,

$$\frac{\partial \ell}{\partial \gamma_k} = \sum_{i=1}^N \sum_{j=1}^{n_i} I(y_{ij} = 0) x_{\gamma,ijk} \frac{p_{ij}(1-p_{ij})(1-1/Z(\lambda_{ij}, v))}{p_{ij} + (1-p_{ij})/Z(\lambda_{ij}, v)} - \sum_{i=1}^N \sum_{j=1}^{n_i} I(y_{ij} \geq 1) x_{\gamma,ijk} p_{ij}.$$

$$\frac{\partial^2 \ell}{\partial \gamma \partial \gamma^T} =$$

$$X_\gamma^T \text{diag} \left[ I(y_{ij} = 0) \frac{p_{ij}(1-p_{ij})(1-1/Z(\lambda_{ij}, v))(1-2 \times p_{ij})(p_{ij} + (1-p_{ij})/Z(\lambda_{ij}, v)) - p_{ij}^2(1-p_{ij})^2(1-1/Z(\lambda_{ij}, v))^2}{\{p_{ij} + (1-p_{ij})/Z(\lambda_{ij}, v)\}^2} \right] X_\gamma -$$

$$X_\gamma^T \text{diag} \left[ I(y_{ij} \geq 1) p_{ij}(1-p_{ij}) \right] X_\gamma,$$

where  $X_\gamma$  is a  $\left( \sum_{i=1}^N n_i \times p_\gamma \right)$  matrix.

• For  $v$ ,

$$\frac{\partial \ell}{\partial v} = \sum_{i=1}^N \sum_{j=1}^{n_i} I(y_{ij} = 0) \frac{(1-p_{ij}) \sum_{s=0}^{\infty} \frac{\log(s!) \lambda_{ij}^s}{(s!)^v} / Z(\lambda_{ij}, v)^2}{p_{ij} + (1-p_{ij})/Z(\lambda_{ij}, v)} +$$

$$\sum_{i=1}^N \sum_{j=1}^{n_i} I(y_{ij} \geq 1) \left( -\log(y_{ij}!) + \sum_{s=0}^{\infty} \frac{\lambda_{ij}^s \log s!}{(s!)^v} / Z(\lambda_{ij}, v) \right).$$

$$\frac{\partial^2 \ell}{\partial v^2} = \sum_{i=1}^N \sum_{j=1}^{n_i} I(y_{ij} = 0) \frac{\left[ \mathcal{H}_{ij} \times \left\{ p_{ij} + (1 - p_{ij}) / Z(\lambda_{ij}, v) \right\} - \left\{ (1 - p_{ij})^2 \sum_{s=0}^{\infty} \frac{\log(s!) \lambda_{ij}^s}{(s!)^v} \right\}^2 / Z(\lambda_{ij}, v)^4 \right]}{\left\{ p_{ij} + (1 - p_{ij}) / Z(\lambda_{ij}, v) \right\}^2} -$$

$$\sum_{i=1}^N \sum_{j=1}^{n_i} I(y_{ij} \geq 1) \left[ \sum_{s=0}^{\infty} \frac{(\log(s!))^2 \lambda_{ij}^s}{(s!)^v} / Z(\lambda_{ij}, v) - \left( \sum_{s=0}^{\infty} \frac{\log(s!) \lambda_{ij}^s}{(s!)^v} / Z(\lambda_{ij}, v) \right)^2 \right],$$

where

$$\mathcal{H}_{ij} = \left[ 2(1 - p_{ij}) \left\{ \sum_{s=0}^{\infty} \frac{\log(s!) \lambda_{ij}^s}{(s!)^v} \right\}^2 / Z(\lambda_{ij}, v)^3 - (1 - p_{ij}) \sum_{s=0}^{\infty} \frac{(\log(s!))^2 \lambda_{ij}^s}{(s!)^v} / Z(\lambda_{ij}, v)^2 \right].$$

• For off-diagonal elements,

$$\frac{\partial^2 \ell}{\partial \beta \partial \gamma^T} = X_{\beta}^T \text{diag} \left[ I(y_{ij} = 0) \right]$$

$$\left. \frac{p_{ij}(1-p_{ij}) \left\{ \sum_{s=0}^{\infty} \frac{s\lambda_{ij}^s}{(s!)^v} / Z(\lambda_{ij}, v)^2 \right\} \left\{ (p_{ij} + (1-p_{ij})/Z(\lambda_{ij}, v)) + (1-p_{ij})(1-1/Z(\lambda_{ij}, v)) \right\}}{\left\{ p_{ij} + (1-p_{ij})/Z(\lambda_{ij}, v) \right\}^2} \right] X_{\gamma}.$$

$$\begin{aligned} \frac{\partial^2 \ell}{\partial \beta_k \partial v} = & \sum_{i=1}^N \sum_{j=1}^{n_i} I(y_{ij} = 0) x_{ijk, \beta} \frac{\left\{ \mathcal{W}_{ij} \times \left\{ p_{ij} + (1-p_{ij})/Z(\lambda_{ij}, v) \right\} - (1-p_{ij})^2 / Z(\lambda_{ij}, v)^4 \sum_{s=0}^{\infty} \frac{s\lambda_{ij}^s}{(s!)^v} \sum_{s=0}^{\infty} \frac{\lambda_{ij}^s \log s!}{(s!)^v} \right\}}{\left\{ p_{ij} + (1-p_{ij})/Z(\lambda_{ij}, v) \right\}^2} \\ & + \sum_{i=1}^N \sum_{j=1}^{n_i} I(y_{ij} \geq 1) x_{ijk, \beta} \left[ \sum_{s=0}^{\infty} \frac{s \log(s!) \lambda_{ij}^s}{(s!)^v} / Z(\lambda_{ij}, v) - \sum_{s=0}^{\infty} \frac{\log(s!) \lambda_{ij}^s}{(s!)^v} \sum_{s=0}^{\infty} \frac{s \lambda_{ij}^s}{(s!)^v} / (Z(\lambda_{ij}, v))^2 \right], \end{aligned}$$

where

$$\mathcal{W}_{ij} = -2(1-p_{ij})/Z(\lambda_{ij}, v)^3 \sum_{s=0}^{\infty} \frac{\lambda_{ij}^s \log s!}{(s!)^v} \sum_{s=0}^{\infty} \frac{s \lambda_{ij}^s}{(s!)^v} - (1-p_{ij})/Z(\lambda_{ij}, v)^2 \sum_{s=0}^{\infty} \frac{s \log(s!) \lambda_{ij}^s}{(s!)^v}.$$

$$\frac{\partial^2 \ell}{\partial \gamma_k \partial v} =$$

$$\sum_{i=1}^N \sum_{j=1}^{n_i} I(y_{ij} = 0) x_{\gamma,ijk} \frac{\left\{ -p_{ij}(1-p_{ij})/Z(\lambda_{ij}, v)^2 \sum_{s=0}^{\infty} \frac{\lambda_{ij}^s \log s!}{(s!)^v} \right\} \left\{ p_{ij} + (1-p_{ij})/Z(\lambda_{ij}, v) + (1-p_{ij})(1-1/Z(\lambda_{ij}, v)) \right\}}{\left\{ p_{ij} + (1-p_{ij})/Z(\lambda_{ij}, v) \right\}^2}.$$



**Web Appendix C.2: A modified(adjusted) sandwich covariance matrix of  $\widehat{\beta}$  and  $\widehat{\gamma}$  based on the MES algorithm**

$B_1$  and  $B_2$  in the modified sandwich variance matrices are given below. Here,  $B_2$  accounts for variability in the  $u_i$ ; see, e.g., Satten and Datta (2000).

$$B_1 = E \sum_{i=1}^N \begin{pmatrix} -\frac{\partial E(\mathbf{y}_i)^T}{\partial \beta} V_{y_i}^{-1} \text{Diag}(\mathbf{1} - \mathbf{u}_i) \frac{\partial E(\mathbf{y}_i)}{\partial \beta} & 0 & -\sum_{j=1}^{n_i} \frac{\partial^2 \ell_{ij}}{\partial \beta \partial v} \\ 0 & -\frac{\partial \mathbf{p}_i(\gamma)^T}{\partial \gamma} V_{u_i}^{-1} \frac{\partial \mathbf{p}_i(\gamma)}{\partial \gamma} & 0 \\ -\frac{\partial}{\partial v} (\Psi_2(\beta))^T & 0 & -\sum_{j=1}^{n_i} \frac{\partial^2 \ell_{ij}}{\partial v^2} \end{pmatrix}.$$

$$B_2 = E \sum_{i=1}^N \begin{pmatrix} -\frac{\partial E(\mathbf{y}_i)^T}{\partial \beta} V_{y_i}^{-1} \text{Diag}(\mathbf{1} - \mathbf{u}_i) (\mathbf{y}_i - E(\mathbf{y}_i(\beta))) \\ -\frac{\partial \mathbf{p}_i(\gamma)^T}{\partial \gamma} V_{u_i}^{-1} (\mathbf{u}_i - \mathbf{p}_i(\gamma)) \\ -(1 - \mathbf{u}_i) \left\{ -\log(\mathbf{y}_i!) + \sum_{s=0}^{\infty} \frac{\lambda_i^s \log s!}{(s!)^v} / Z(\boldsymbol{\lambda}_i, v) \right\}^T \end{pmatrix} \widetilde{\mathcal{S}}_i(\mathbf{u}_i, \mathbf{y}_i | \theta = \beta, \gamma, v) -$$

$$\sum_{i=1}^N \begin{pmatrix} -\frac{\partial E(\mathbf{y}_i)^T}{\partial \beta} V_{y_i}^{-1} \text{Diag}(\mathbf{1} - E(\mathbf{u}_i)) (\mathbf{y}_i - E(\mathbf{y}_i(\beta))) \\ -\frac{\partial \mathbf{p}_i(\gamma)^T}{\partial \gamma} V_{u_i}^{-1} (E(\mathbf{u}_i) - \mathbf{p}_i(\gamma)) \\ -(1 - E(\mathbf{u}_i)) \left\{ -\log(\mathbf{y}_i!) + \sum_{s=0}^{\infty} \frac{\lambda_i^s \log s!}{(s!)^v} / Z(\boldsymbol{\lambda}_i, v) \right\}^T \end{pmatrix} \widetilde{\mathcal{S}}_i(\mathbf{y}_i | \theta = \beta, \gamma, v),$$

where  $\tilde{S}_i(\mathbf{u}_i, \mathbf{y}_i | \theta = \beta, \gamma, v) = \frac{\partial \log f(\mathbf{u}_i, \mathbf{y}_i | \theta)}{\partial \theta^T}$ ,  $\tilde{S}_i(\mathbf{u}_i | \theta = \beta, \gamma, v) = \frac{\partial \log f(\mathbf{y}_i | \theta)}{\partial \theta^T} = \int \log f(\mathbf{u}_i, \mathbf{y}_i | \theta^T) dF(u_{i1}, \dots, u_{in_i} | y_{i1}, \dots, y_{in_i})$ , and  $M_{\text{MES}} =$

$$\sum_{i=1}^N \left( \begin{array}{c} \frac{\partial E(\mathbf{y}_i)^T}{\partial \beta} V_{y_i}^{-1} \text{Diag}(\mathbf{1} - \mathbf{u}_i) (\mathbf{y}_i - E(\mathbf{y}_i(\beta))) \\ \frac{\partial \mathbf{p}_i(\gamma)^T}{\partial \gamma} V_{u_i}^{-1} (\mathbf{u}_i - \mathbf{p}_i(\gamma)) \\ \sum_{j=1}^{n_i} \frac{\partial \ell_{ij}^c}{\partial v} \end{array} \right) \Big|_{(\hat{\beta}, \hat{\gamma}, \hat{v})} \left( \begin{array}{c} \frac{\partial E(\mathbf{y}_i)^T}{\partial \beta} V_{y_i}^{-1} \text{Diag}(\mathbf{1} - \mathbf{u}_i) (\mathbf{y}_i - E(\mathbf{y}_i(\beta))) \\ \frac{\partial \mathbf{p}_i(\gamma)^T}{\partial \gamma} V_{u_i}^{-1} (\mathbf{u}_i - \mathbf{p}_i(\gamma)) \\ \sum_{j=1}^{n_i} \frac{\partial \ell_{ij}^c}{\partial v} \end{array} \right)^T \Big|_{(\hat{\beta}, \hat{\gamma}, \hat{v})} .$$

Note that we use the final estimate of the  $u_{ij}$  in all of the above.

WEB TABLE 1

Empirical bias and variance of our ZICMP estimators in a simulation study guided by the *airfreight breakage data*. The number of clusters is 30; the size of each cluster is 20.

Each entry is based on 100 Monte Carlo iterations.

| MPL        |        |                            |        |         |             |                             |        |         |             |
|------------|--------|----------------------------|--------|---------|-------------|-----------------------------|--------|---------|-------------|
|            | True   | Low intraclass correlation |        |         |             | High intraclass correlation |        |         |             |
|            |        | Bias                       | SE     | SE (BS) | SE (Adj_SW) | Bias                        | SE     | SE (BS) | SE (Adj_SW) |
| $\beta_0$  | 13.8   | 0.2368                     | 1.2988 | 1.2472  | 1.2059      | 1.3290                      | 3.4226 | 2.8328  | 2.8935      |
| $\beta_1$  | 1.3    | 0.0236                     | 0.1388 | 0.1240  | 0.1200      | 0.1225                      | 0.3239 | 0.2696  | 0.2741      |
| $\gamma_0$ | 2      | -0.0008                    | 0.2553 | 0.2509  | 0.3063      | 0.0485                      | 0.3975 | 0.6196  | 0.5227      |
| $\gamma_1$ | -3     | -0.0174                    | 0.2497 | 0.2428  | 0.2825      | -0.0763                     | 0.3960 | 0.6763  | 0.4995      |
| $v$        | 5.7818 | 0.1004                     | 0.5514 | 0.5201  | 0.5031      | 0.5567                      | 1.4247 | 1.1796  | 1.2053      |

  

| MES        |        |                            |        |         |                             |        |         |  |  |
|------------|--------|----------------------------|--------|---------|-----------------------------|--------|---------|--|--|
|            | True   | Low intraclass correlation |        |         | High intraclass correlation |        |         |  |  |
|            |        | Bias                       | SE     | SE (BS) | Bias                        | SE     | SE (BS) |  |  |
| $\beta_0$  | 13.8   | 0.2383                     | 1.3009 | 1.2592  | 1.3175                      | 3.4271 | 2.3657  |  |  |
| $\beta_1$  | 1.3    | 0.0230                     | 0.1376 | 0.1395  | 0.1232                      | 0.3217 | 0.4115  |  |  |
| $\gamma_0$ | 2      | 0.0062                     | 0.2553 | 0.2512  | 0.0587                      | 0.4229 | 0.7440  |  |  |
| $\gamma_1$ | -3     | -0.0141                    | 0.2546 | 0.2397  | -0.1044                     | 0.3932 | 0.4364  |  |  |
| $v$        | 5.7818 | 0.1005                     | 0.5515 | 0.5338  | 0.5533                      | 1.4188 | 0.9935  |  |  |

SE: Monte Carlo based empirical standard error; SE (BS): bootstrap estimated standard error, SE (Adj\_SW): square root of adjusted sandwich variance estimate.

WEB TABLE 2

Empirical bias and variance of our ZICMP estimators in a simulation study guided by the *airfreight breakage data*. The number of clusters is 75; the size of each cluster is 15. Each entry is based on 100 Monte Carlo iterations.

| MPL        |        |                            |        |         |             |                             |        |         |             |
|------------|--------|----------------------------|--------|---------|-------------|-----------------------------|--------|---------|-------------|
|            | True   | Low intraclass correlation |        |         |             | High intraclass correlation |        |         |             |
|            |        | Bias                       | SE     | SE (BS) | SE (Adj_SW) | Bias                        | SE     | SE (BS) | SE (Adj_SW) |
| $\beta_0$  | 13.8   | 0.0991                     | 0.9378 | 0.8927  | 0.8666      | 0.1844                      | 1.8638 | 1.9151  | 1.8809      |
| $\beta_1$  | 1.3    | 0.0105                     | 0.0827 | 0.0874  | 0.0855      | 0.0177                      | 0.1773 | 0.1799  | 0.1776      |
| $\gamma_0$ | 2      | 0.0046                     | 0.1683 | 0.1713  | 0.2094      | 0.0448                      | 0.2876 | 0.2818  | 0.3433      |
| $\gamma_1$ | -3     | -0.0223                    | 0.1895 | 0.1769  | 0.2089      | -0.0435                     | 0.3031 | 0.2834  | 0.3359      |
| $v$        | 5.7818 | 0.0432                     | 0.3874 | 0.3710  | 0.3608      | 0.0774                      | 0.7797 | 0.7960  | 0.7827      |

  

| MES        |        |                            |        |         |                             |        |         |  |  |
|------------|--------|----------------------------|--------|---------|-----------------------------|--------|---------|--|--|
|            | True   | Low intraclass correlation |        |         | High intraclass correlation |        |         |  |  |
|            |        | Bias                       | SE     | SE (BS) | Bias                        | SE     | SE (BS) |  |  |
| $\beta_0$  | 13.8   | 0.1004                     | 0.9380 | 0.8607  | 0.1993                      | 1.8663 | 1.7956  |  |  |
| $\beta_1$  | 1.3    | 0.0100                     | 0.0821 | 0.0860  | 0.0160                      | 0.1783 | 0.2519  |  |  |
| $\gamma_0$ | 2      | 0.0072                     | 0.1679 | 0.1676  | 0.0382                      | 0.2604 | 0.2848  |  |  |
| $\gamma_1$ | -3     | -0.0233                    | 0.1891 | 0.1731  | -0.0405                     | 0.2927 | 0.2826  |  |  |
| $v$        | 5.7818 | 0.0433                     | 0.3874 | 0.3587  | 0.0825                      | 0.7873 | 0.7761  |  |  |

SE: Monte Carlo based empirical standard error; SE (BS): bootstrap estimated standard error, SE (Adj\_SW): square root of adjusted sandwich variance estimate.

## WEB FIGURE 1

Empirical coverage of the confidence intervals in a simulation study guided by the dental data of nine-year-old children from the Iowa Fluoride Study. The p-p plots are for  $N = 200$  and  $n = 15$  when intra-cluster correlation is low. Three sets of plots are provided for the regression parameters corresponding to the four covariates: ZICMP/MPL (upper left panel), ZICMP/MES (upper right panel), ZIP (bottom left panel) and ZIP with Adj\_SW (bottom right panel).

(a) Coverage probabilities based on ZICMP/MPL

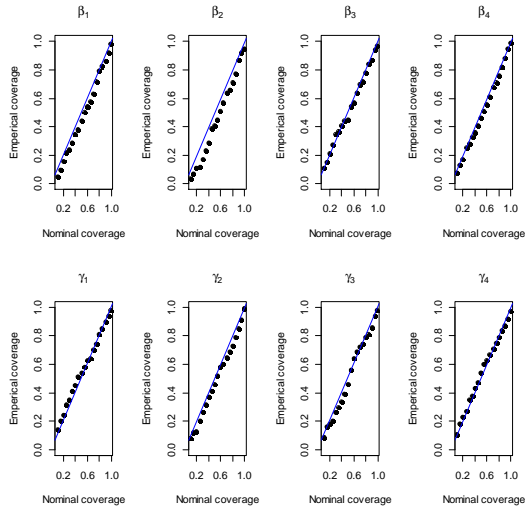

(b) Coverage probabilities based on ZICMP/MES

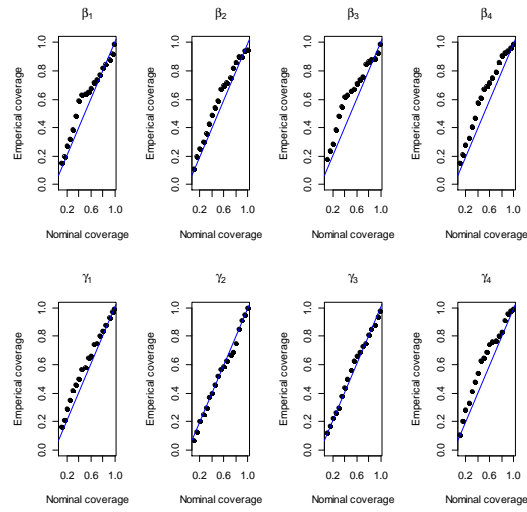

(c) Coverage probabilities based on ZIP

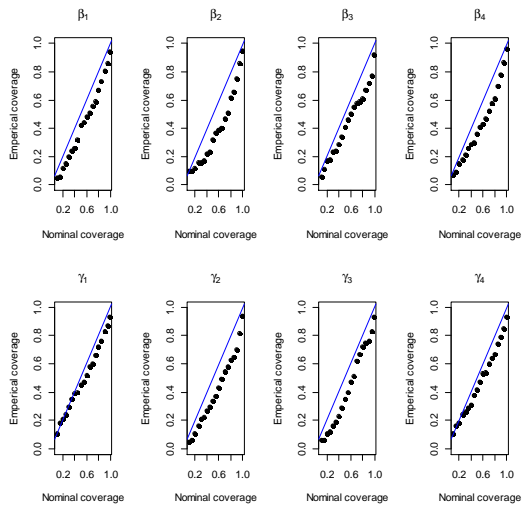

(d) Coverage probabilities based on ZIP with Adj\_SW

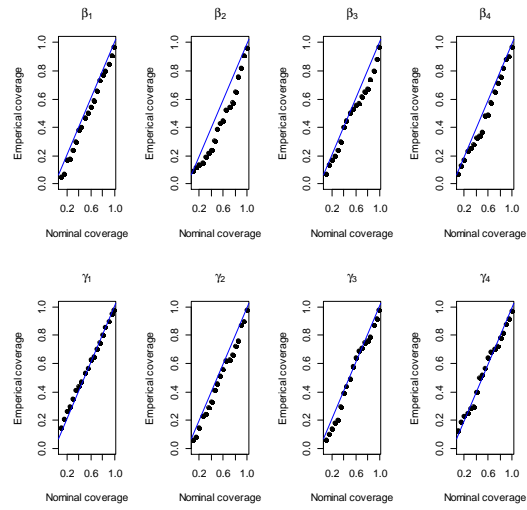

Supplement: NIHMS735270-supplement-Supp_MaterialS1.pdf [file NIHMS735270-supplement-Supp_MaterialS1.pdf]
